# Supplementary material for: Trypanocidal Effect of Isotretinoin through the Inhibition of Polyamine and Amino Acid Transporters in Trypanosoma cruzi
Source: PubMed Central journal article supplement (PMC5371382; doi:10.1371/journal.pntd.0005472), 2017-03-17
Supplement: pntd.0005472.s001.pdf [file pntd.0005472.s001.pdf]

|     | C1   | C2   | C3   | C4   | C5   | C6   | C7   | C8   | C9   | C10  |
|-----|------|------|------|------|------|------|------|------|------|------|
| C1  | 1    | 0,84 | 0,85 | 0,84 | 0,8  | 0,8  | 0,84 | 0,66 | 0,13 | 0,15 |
| C2  | 0,84 | 1    | 0,71 | 1    | 0,95 | 0,95 | 1    | 0,77 | 0,14 | 0,17 |
| C3  | 0,85 | 0,71 | 1    | 0,71 | 0,74 | 0,74 | 0,71 | 0,79 | 0,13 | 0,14 |
| C4  | 0,84 | 1    | 0,71 | 1    | 0,95 | 0,95 | 1    | 0,77 | 0,14 | 0,17 |
| C5  | 0,8  | 0,95 | 0,74 | 0,95 | 1    | 1    | 0,95 | 0,8  | 0,15 | 0,17 |
| C6  | 0,8  | 0,95 | 0,74 | 0,95 | 1    | 1    | 0,95 | 0,8  | 0,15 | 0,17 |
| C7  | 0,84 | 1    | 0,71 | 1    | 0,95 | 0,95 | 1    | 0,77 | 0,14 | 0,17 |
| C8  | 0,66 | 0,77 | 0,79 | 0,77 | 0,8  | 0,8  | 0,77 | 1    | 0,13 | 0,15 |
| C9  | 0,13 | 0,14 | 0,13 | 0,14 | 0,15 | 0,15 | 0,14 | 0,13 | 1    | 0,45 |
| C10 | 0,15 | 0,17 | 0,14 | 0,17 | 0,17 | 0,17 | 0,17 | 0,15 | 0,45 | 1    |

**S1 Fig. Similarity matrix, based on the Tanimoto coefficient.** All compounds (C1 – C10), obtained from the first step of virtual screening, were used to construct a similarity matrix. Indicated values were calculated based on the Tanimoto coefficient by comparing between each set of similarity scores. The name of each compound was indicated in Table 1.
