# Supplementary material for: Trypanocidal Effect of Isotretinoin through the Inhibition of Polyamine and Amino Acid Transporters in Trypanosoma cruzi
Source: PubMed Central journal article supplement (PMC5371382; doi:10.1371/journal.pntd.0005472), 2017-03-17
Supplement: pntd.0005472.s002.pdf [file pntd.0005472.s002.pdf]

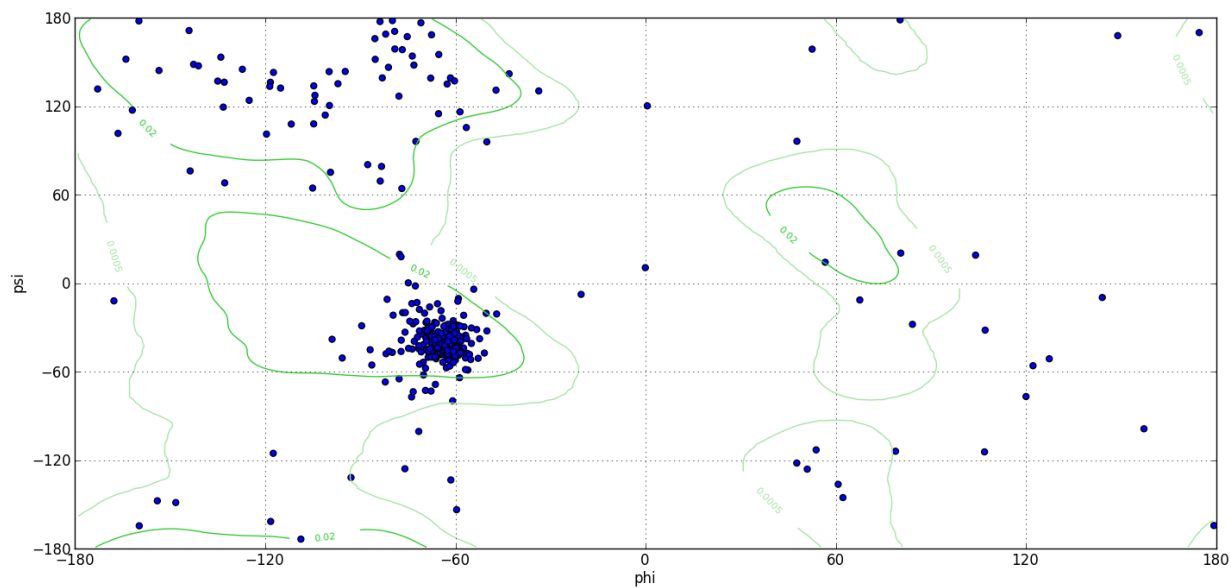

**S2 Fig. Evaluation of *TcPAT12* model by Ramachandran Plot.** Analysis of  $\Phi$  and  $\Psi$  backbone angles on a Ramachandran plot for the homology modeled *TcPAT12*, with 86.5% of residues in the favored region, 9.1% in allowed region and 4.3% in outlier region.
